# Supplementary material
Source: publisher figshare collection journal article supplement (https://sage.figshare.com/ndownloader/files/14523260)
Supplement: Supplementary file 1 [file 14523260]

| Sequence            | Prob | Mascot Ion score | Spectral count |
|---------------------|------|------------------|----------------|
| SFLEFAEDVIQVPR      | 100% | 69.34            | 75             |
| MEELVVEVR           | 100% | 70.36            | 52             |
| VLVASSVVAGESQKPELK  | 100% | 73.15            | 36             |
| LIQEIVDK            | 99%  | 36.68            | 27             |
| LQIDEQLR            | 99%  | 48.9             | 27             |
| DINESDEVEVYSR       | 100% | 84.36            | 19             |
| VGPNAPPEEK          | 100% | 59.24            | 19             |
| FPPVGYNK            | 99%  | 32.39            | 18             |
| EDLMGLAIGTHGANIQQAR | 100% | 68.42            | 17             |
| DVHEDSITVAFENNWQPDR | 100% | 90.12            | 15             |
| LDVPEDLR            | 99%  | 33.81            | 14             |
| TTDGSLQIR           | 100% | 70.09            | 13             |
| SYVTDDGQGMGR        | 100% | 58.75            | 12             |

Prob= probability, indicative of the peptide identification confidence; Mascot Ion score= Mascot algorithm metric for evaluating the identity of the peptide/protein; Spectral count= based on total MS/MS data.
